# Supplementary material for: Serological Evidence of Avian Influenza in Captive Wild Birds in a Zoo and Two Safari Parks in Bangladesh
Source: Vet Sci. 2020 Sep 1;7(3):122. doi: 10.3390/vetsci7030122 (PMC7558454; doi:10.3390/vetsci7030122)
Supplement: Supplementary file 1 [file vetsci-07-00122-s001.xls]

## Sheet: Corrected
Serial N	Sample ID	Sample material	Date	Year	Collection Site	Location	Host_Species	Host_Common_Name	Host_Health	Host_Natural_State	Host Age	Host Sex	Host_Capture_Status	Collector Institution	Collection City	Collection_Country	Influenza_Test_Type	Influenza_Test_Result	Influenza_Test_Type	Influenza_Test_Result	Influenza_Test_Type	Influenza_Test_Result
1	1	Blood, Oropharyngeal and cloacal swabs	2013-11-05	2013	Mirpur Zoo	Dhaka	Pseudibis papillosa	Red-naped ibis	Healthy	Wild	Adult	Unidentified	Release after sampling	Chattogram Veterinary and Animal Sciences University	Dhaka	Bangladesh	rRT-PCR	Negative	c-ELISA	Negative	Haemagglutination inhibition	Negative
2	2	Blood, Oropharyngeal and cloacal swabs	2013-11-05	2013	Mirpur Zoo	Dhaka	Pseudibis papillosa	Red-naped ibis	Healthy	Wild	Adult	Unidentified	Release after sampling	Chattogram Veterinary and Animal Sciences University	Dhaka	Bangladesh	rRT-PCR	Negative	c-ELISA	Negative	Haemagglutination inhibition	Negative
3	3	Blood, Oropharyngeal and cloacal swabs	2013-11-05	2013	Mirpur Zoo	Dhaka	Pseudibis papillosa	Red-naped ibis	Healthy	Wild	Adult	Unidentified	Release after sampling	Chattogram Veterinary and Animal Sciences University	Dhaka	Bangladesh	rRT-PCR	Negative	c-ELISA	Negative	Haemagglutination inhibition	Negative
4	4	Blood, Oropharyngeal and cloacal swabs	2013-11-05	2013	Mirpur Zoo	Dhaka	Pseudibis papillosa	Red-naped ibis	Healthy	Wild	Adult	Unidentified	Release after sampling	Chattogram Veterinary and Animal Sciences University	Dhaka	Bangladesh	rRT-PCR	Negative	c-ELISA	Negative	Haemagglutination inhibition	Negative
5	5	Blood, Oropharyngeal and cloacal swabs	2013-11-05	2013	Mirpur Zoo	Dhaka	Numida meleagris	Guinea fowl	Healthy	Wild	Adult	Unidentified	Release after sampling	Chattogram Veterinary and Animal Sciences University	Dhaka	Bangladesh	rRT-PCR	Negative	c-ELISA	Negative	Haemagglutination inhibition	Negative
6	6	Blood, Oropharyngeal and cloacal swabs	2013-11-05	2013	Mirpur Zoo	Dhaka	Numida meleagris	Guinea fowl	Healthy	Wild	Adult	Unidentified	Release after sampling	Chattogram Veterinary and Animal Sciences University	Dhaka	Bangladesh	rRT-PCR	Negative	c-ELISA	Negative	Haemagglutination inhibition	Negative
7	7	Blood, Oropharyngeal and cloacal swabs	2013-11-05	2013	Mirpur Zoo	Dhaka	Numida meleagris	Guinea fowl	Healthy	Wild	Adult	Unidentified	Release after sampling	Chattogram Veterinary and Animal Sciences University	Dhaka	Bangladesh	rRT-PCR	Negative	c-ELISA	Negative	Haemagglutination inhibition	Negative
8	8	Blood, Oropharyngeal and cloacal swabs	2013-11-05	2013	Mirpur Zoo	Dhaka	Numida meleagris	Guinea fowl	Healthy	Wild	Adult	Unidentified	Release after sampling	Chattogram Veterinary and Animal Sciences University	Dhaka	Bangladesh	rRT-PCR	Negative	c-ELISA	Negative	Haemagglutination inhibition	Negative
9	9	Blood, Oropharyngeal and cloacal swabs	2013-11-05	2013	Mirpur Zoo	Dhaka	Buceros bicornis	Raj dhonesh	Healthy	Wild	Adult	Unidentified	Release after sampling	Chattogram Veterinary and Animal Sciences University	Dhaka	Bangladesh	rRT-PCR	Negative	c-ELISA	Negative	Haemagglutination inhibition	Negative
10	10	Blood, Oropharyngeal and cloacal swabs	2013-11-05	2013	Mirpur Zoo	Dhaka	Buceros bicornis	Raj dhonesh	Healthy	Wild	Adult	Unidentified	Release after sampling	Chattogram Veterinary and Animal Sciences University	Dhaka	Bangladesh	rRT-PCR	Negative	c-ELISA	Negative	Haemagglutination inhibition	Negative
11	11	Blood, Oropharyngeal and cloacal swabs	2013-11-05	2013	Mirpur Zoo	Dhaka	Buceros bicornis	Raj dhonesh	Healthy	Wild	Adult	Unidentified	Release after sampling	Chattogram Veterinary and Animal Sciences University	Dhaka	Bangladesh	rRT-PCR	Negative	c-ELISA	Negative	Haemagglutination inhibition	Negative
12	12	Blood, Oropharyngeal and cloacal swabs	2013-11-05	2013	Mirpur Zoo	Dhaka	Pseudibis papillosa	Red-naped ibis	Healthy	Wild	Adult	Unidentified	Release after sampling	Chattogram Veterinary and Animal Sciences University	Dhaka	Bangladesh	rRT-PCR	Negative	c-ELISA	Negative	Haemagglutination inhibition	Negative
13	13	Blood, Oropharyngeal and cloacal swabs	2013-11-05	2013	Mirpur Zoo	Dhaka	Pseudibis papillosa	Red-naped ibis	Healthy	Wild	Adult	Unidentified	Release after sampling	Chattogram Veterinary and Animal Sciences University	Dhaka	Bangladesh	rRT-PCR	Negative	c-ELISA	Negative	Haemagglutination inhibition	Negative
14	14	Blood, Oropharyngeal and cloacal swabs	2013-11-05	2013	Mirpur Zoo	Dhaka	Numida meleagris	Guinea fowl	Healthy	Wild	Adult	Unidentified	Release after sampling	Chattogram Veterinary and Animal Sciences University	Dhaka	Bangladesh	rRT-PCR	Negative	c-ELISA	Negative	Haemagglutination inhibition	Negative
15	15	Blood, Oropharyngeal and cloacal swabs	2013-11-05	2013	Mirpur Zoo	Dhaka	Numida meleagris	Guinea fowl	Healthy	Wild	Adult	Unidentified	Release after sampling	Chattogram Veterinary and Animal Sciences University	Dhaka	Bangladesh	rRT-PCR	Negative	c-ELISA	Negative	Haemagglutination inhibition	Negative
16	16	Blood, Oropharyngeal and cloacal swabs	2013-11-05	2013	Mirpur Zoo	Dhaka	Numida meleagris	Guinea fowl	Healthy	Wild	Adult	Unidentified	Release after sampling	Chattogram Veterinary and Animal Sciences University	Dhaka	Bangladesh	rRT-PCR	Negative	c-ELISA	Negative	Haemagglutination inhibition	Negative
17	17	Blood, Oropharyngeal and cloacal swabs	2013-11-07	2013	Mirpur Zoo	Dhaka	Numida meleagris	Guinea fowl	Healthy	Wild	Adult	Unidentified	Release after sampling	Chattogram Veterinary and Animal Sciences University	Dhaka	Bangladesh	rRT-PCR	Negative	c-ELISA	Negative	Haemagglutination inhibition	Negative
18	18	Blood, Oropharyngeal and cloacal swabs	2013-11-07	2013	Mirpur Zoo	Dhaka	Numida meleagris	Guinea fowl	Healthy	Wild	Adult	Unidentified	Release after sampling	Chattogram Veterinary and Animal Sciences University	Dhaka	Bangladesh	rRT-PCR	Negative	c-ELISA	Negative	Haemagglutination inhibition	Negative
19	19	Blood, Oropharyngeal and cloacal swabs	2013-11-07	2013	Mirpur Zoo	Dhaka	Numida meleagris	Guinea fowl	Healthy	Wild	Adult	Unidentified	Release after sampling	Chattogram Veterinary and Animal Sciences University	Dhaka	Bangladesh	rRT-PCR	Negative	c-ELISA	Negative	Haemagglutination inhibition	Negative
20	20	Blood, Oropharyngeal and cloacal swabs	2013-11-07	2013	Mirpur Zoo	Dhaka	Numida meleagris	Guinea fowl	Healthy	Wild	Adult	Unidentified	Release after sampling	Chattogram Veterinary and Animal Sciences University	Dhaka	Bangladesh	rRT-PCR	Negative	c-ELISA	Negative	Haemagglutination inhibition	Negative
21	21	Blood, Oropharyngeal and cloacal swabs	2013-11-07	2013	Mirpur Zoo	Dhaka	Numida meleagris	Guinea fowl	Healthy	Wild	Adult	Unidentified	Release after sampling	Chattogram Veterinary and Animal Sciences University	Dhaka	Bangladesh	rRT-PCR	Negative	c-ELISA	Negative	Haemagglutination inhibition	Negative
22	22	Blood, Oropharyngeal and cloacal swabs	2013-11-07	2013	Mirpur Zoo	Dhaka	Numida meleagris	Guinea fowl	Healthy	Wild	Adult	Unidentified	Release after sampling	Chattogram Veterinary and Animal Sciences University	Dhaka	Bangladesh	rRT-PCR	Negative	c-ELISA	Negative	Haemagglutination inhibition	Negative
23	23	Blood, Oropharyngeal and cloacal swabs	2013-11-07	2013	Mirpur Zoo	Dhaka	Numida meleagris	Guinea fowl	Healthy	Wild	Adult	Unidentified	Release after sampling	Chattogram Veterinary and Animal Sciences University	Dhaka	Bangladesh	rRT-PCR	Negative	c-ELISA	Negative	Haemagglutination inhibition	Negative
24	24	Blood, Oropharyngeal and cloacal swabs	2013-11-07	2013	Mirpur Zoo	Dhaka	Numida meleagris	Guinea fowl	Healthy	Wild	Adult	Unidentified	Release after sampling	Chattogram Veterinary and Animal Sciences University	Dhaka	Bangladesh	rRT-PCR	Negative	c-ELISA	Positive	Haemagglutination inhibition	H9
25	25	Blood, Oropharyngeal and cloacal swabs	2013-11-07	2013	Mirpur Zoo	Dhaka	Numida meleagris	Guinea fowl	Healthy	Wild	Adult	Unidentified	Release after sampling	Chattogram Veterinary and Animal Sciences University	Dhaka	Bangladesh	rRT-PCR	Negative	c-ELISA	Negative	Haemagglutination inhibition	Negative
26	26	Blood, Oropharyngeal and cloacal swabs	2013-11-07	2013	Mirpur Zoo	Dhaka	Numida meleagris	Guinea fowl	Healthy	Wild	Adult	Unidentified	Release after sampling	Chattogram Veterinary and Animal Sciences University	Dhaka	Bangladesh	rRT-PCR	Negative	c-ELISA	Negative	Haemagglutination inhibition	Negative
27	27	Blood, Oropharyngeal and cloacal swabs	2013-11-07	2013	Mirpur Zoo	Dhaka	Numida meleagris	Guinea fowl	Healthy	Wild	Adult	Unidentified	Release after sampling	Chattogram Veterinary and Animal Sciences University	Dhaka	Bangladesh	rRT-PCR	Negative	c-ELISA	Negative	Haemagglutination inhibition	Negative
28	28	Blood, Oropharyngeal and cloacal swabs	2013-11-07	2013	Mirpur Zoo	Dhaka	Buceros bicornis	Raj dhonesh	Healthy	Wild	Adult	Unidentified	Release after sampling	Chattogram Veterinary and Animal Sciences University	Dhaka	Bangladesh	rRT-PCR	Negative	c-ELISA	Negative	Haemagglutination inhibition	Negative
29	29	Blood, Oropharyngeal and cloacal swabs	2013-11-07	2013	Mirpur Zoo	Dhaka	Buceros bicornis	Raj dhonesh	Healthy	Wild	Adult	Unidentified	Release after sampling	Chattogram Veterinary and Animal Sciences University	Dhaka	Bangladesh	rRT-PCR	Negative	c-ELISA	Negative	Haemagglutination inhibition	Negative
30	30	Blood, Oropharyngeal and cloacal swabs	2013-11-07	2013	Mirpur Zoo	Dhaka	Buceros bicornis	Raj dhonesh	Healthy	Wild	Adult	Unidentified	Release after sampling	Chattogram Veterinary and Animal Sciences University	Dhaka	Bangladesh	rRT-PCR	Negative	c-ELISA	Positive	Haemagglutination inhibition	Negative
31	31	Blood, Oropharyngeal and cloacal swabs	2013-11-07	2013	Mirpur Zoo	Dhaka	Buceros bicornis	Raj dhonesh	Healthy	Wild	Adult	Unidentified	Release after sampling	Chattogram Veterinary and Animal Sciences University	Dhaka	Bangladesh	rRT-PCR	Negative	c-ELISA	Negative	Haemagglutination inhibition	Negative
32	32	Blood, Oropharyngeal and cloacal swabs	2013-11-07	2013	Mirpur Zoo	Dhaka	Buceros bicornis	Raj dhonesh	Healthy	Wild	Adult	Unidentified	Release after sampling	Chattogram Veterinary and Animal Sciences University	Dhaka	Bangladesh	rRT-PCR	Negative	c-ELISA	Negative	Haemagglutination inhibition	Negative
33	33	Blood, Oropharyngeal and cloacal swabs	2013-11-18	2013	Safari Park	Gazipur	Chrysolophus pictus	Golden pheasant	Healthy	Wild	Adult	Unidentified	Release after sampling	Chattogram Veterinary and Animal Sciences University	Gazipur	Bangladesh	rRT-PCR	Negative	c-ELISA	Negative	Haemagglutination inhibition	Negative
34	34	Blood, Oropharyngeal and cloacal swabs	2013-11-18	2013	Safari Park	Gazipur	Chrysolophus pictus	Golden pheasant	Healthy	Wild	Adult	Unidentified	Release after sampling	Chattogram Veterinary and Animal Sciences University	Gazipur	Bangladesh	rRT-PCR	Negative	c-ELISA	Negative	Haemagglutination inhibition	Negative
35	35	Blood, Oropharyngeal and cloacal swabs	2013-11-18	2013	Safari Park	Gazipur	Chrysolophus pictus	Golden pheasant	Healthy	Wild	Adult	Unidentified	Release after sampling	Chattogram Veterinary and Animal Sciences University	Gazipur	Bangladesh	rRT-PCR	Negative	c-ELISA	Negative	Haemagglutination inhibition	Negative
36	36	Blood, Oropharyngeal and cloacal swabs	2013-11-18	2013	Safari Park	Gazipur	Chrysolophus pictus	Golden pheasant	Healthy	Wild	Adult	Unidentified	Release after sampling	Chattogram Veterinary and Animal Sciences University	Gazipur	Bangladesh	rRT-PCR	Negative	c-ELISA	Positive	Haemagglutination inhibition	H9
37	37	Blood, Oropharyngeal and cloacal swabs	2013-11-18	2013	Safari Park	Gazipur	Chrysolophus pictus	Golden pheasant	Healthy	Wild	Adult	Unidentified	Release after sampling	Chattogram Veterinary and Animal Sciences University	Gazipur	Bangladesh	rRT-PCR	Negative	c-ELISA	Negative	Haemagglutination inhibition	Negative
38	38	Blood, Oropharyngeal and cloacal swabs	2013-11-18	2013	Safari Park	Gazipur	Chrysolophus pictus	Golden pheasant	Healthy	Wild	Adult	Unidentified	Release after sampling	Chattogram Veterinary and Animal Sciences University	Gazipur	Bangladesh	rRT-PCR	Negative	c-ELISA	Negative	Haemagglutination inhibition	Negative
39	39	Blood, Oropharyngeal and cloacal swabs	2013-11-18	2013	Safari Park	Gazipur	Chrysolophus pictus	Golden pheasant	Healthy	Wild	Adult	Unidentified	Release after sampling	Chattogram Veterinary and Animal Sciences University	Gazipur	Bangladesh	rRT-PCR	Negative	c-ELISA	Negative	Haemagglutination inhibition	Negative
40	40	Blood, Oropharyngeal and cloacal swabs	2013-11-18	2013	Safari Park	Gazipur	Chrysolophus pictus	Golden pheasant	Healthy	Wild	Adult	Unidentified	Release after sampling	Chattogram Veterinary and Animal Sciences University	Gazipur	Bangladesh	rRT-PCR	Negative	c-ELISA	Negative	Haemagglutination inhibition	Negative
41	41	Blood, Oropharyngeal and cloacal swabs	2013-11-18	2013	Safari Park	Gazipur	Chrysolophus pictus	Golden pheasant	Healthy	Wild	Adult	Unidentified	Release after sampling	Chattogram Veterinary and Animal Sciences University	Gazipur	Bangladesh	rRT-PCR	Negative	c-ELISA	Negative	Haemagglutination inhibition	Negative
42	42	Blood, Oropharyngeal and cloacal swabs	2013-11-18	2013	Safari Park	Gazipur	Chrysolophus pictus	Golden pheasant	Healthy	Wild	Adult	Unidentified	Release after sampling	Chattogram Veterinary and Animal Sciences University	Gazipur	Bangladesh	rRT-PCR	Negative	c-ELISA	Negative	Haemagglutination inhibition	Negative
43	43	Blood, Oropharyngeal and cloacal swabs	2013-11-18	2013	Safari Park	Gazipur	Chrysolophus pictus	Golden pheasant	Healthy	Wild	Adult	Unidentified	Release after sampling	Chattogram Veterinary and Animal Sciences University	Gazipur	Bangladesh	rRT-PCR	Negative	c-ELISA	Positive	Haemagglutination inhibition	Negative
44	44	Blood, Oropharyngeal and cloacal swabs	2013-11-18	2013	Safari Park	Gazipur	Chrysolophus pictus	Golden pheasant	Healthy	Wild	Adult	Unidentified	Release after sampling	Chattogram Veterinary and Animal Sciences University	Gazipur	Bangladesh	rRT-PCR	Negative	c-ELISA	Negative	Haemagglutination inhibition	Negative
45	45	Blood, Oropharyngeal and cloacal swabs	2013-11-18	2013	Safari Park	Gazipur	Chrysolophus pictus	Golden pheasant	Healthy	Wild	Adult	Unidentified	Release after sampling	Chattogram Veterinary and Animal Sciences University	Gazipur	Bangladesh	rRT-PCR	Negative	c-ELISA	Positive	Haemagglutination inhibition	H9
46	46	Blood, Oropharyngeal and cloacal swabs	2013-11-18	2013	Safari Park	Gazipur	Chrysolophus pictus	Golden pheasant	Healthy	Wild	Adult	Unidentified	Release after sampling	Chattogram Veterinary and Animal Sciences University	Gazipur	Bangladesh	rRT-PCR	Negative	c-ELISA	Positive	Haemagglutination inhibition	H9
47	47	Blood, Oropharyngeal and cloacal swabs	2013-11-18	2013	Safari Park	Gazipur	Chrysolophus pictus	Golden pheasant	Healthy	Wild	Adult	Unidentified	Release after sampling	Chattogram Veterinary and Animal Sciences University	Gazipur	Bangladesh	rRT-PCR	Negative	c-ELISA	Negative	Haemagglutination inhibition	Negative
48	48	Blood, Oropharyngeal and cloacal swabs	2013-11-19	2013	Safari Park	Gazipur	Chrysolophus pictus	Golden pheasant	Healthy	Wild	Adult	Unidentified	Release after sampling	Chattogram Veterinary and Animal Sciences University	Gazipur	Bangladesh	rRT-PCR	Negative	c-ELISA	Negative	Haemagglutination inhibition	Negative
49	49	Blood, Oropharyngeal and cloacal swabs	2013-11-19	2013	Safari Park	Gazipur	Chrysolophus pictus	Golden pheasant	Healthy	Wild	Adult	Unidentified	Release after sampling	Chattogram Veterinary and Animal Sciences University	Gazipur	Bangladesh	rRT-PCR	Negative	c-ELISA	Negative	Haemagglutination inhibition	Negative
50	50	Blood, Oropharyngeal and cloacal swabs	2013-11-19	2013	Safari Park	Gazipur	Chrysolophus pictus	Golden pheasant	Healthy	Wild	Adult	Unidentified	Release after sampling	Chattogram Veterinary and Animal Sciences University	Gazipur	Bangladesh	rRT-PCR	Negative	c-ELISA	Negative	Haemagglutination inhibition	Negative
51	51	Blood, Oropharyngeal and cloacal swabs	2013-11-19	2013	Safari Park	Gazipur	Chrysolophus pictus	Golden pheasant	Healthy	Wild	Adult	Unidentified	Release after sampling	Chattogram Veterinary and Animal Sciences University	Gazipur	Bangladesh	rRT-PCR	Negative	c-ELISA	Negative	Haemagglutination inhibition	Negative
52	52	Blood, Oropharyngeal and cloacal swabs	2013-11-19	2013	Safari Park	Gazipur	Chrysolophus pictus	Golden pheasant	Healthy	Wild	Adult	Unidentified	Release after sampling	Chattogram Veterinary and Animal Sciences University	Gazipur	Bangladesh	rRT-PCR	Negative	c-ELISA	Negative	Haemagglutination inhibition	Negative
53	53	Blood, Oropharyngeal and cloacal swabs	2013-11-19	2013	Safari Park	Gazipur	Pavo muticus	Green peafowl	Healthy	Wild	Adult	Unidentified	Release after sampling	Chattogram Veterinary and Animal Sciences University	Gazipur	Bangladesh	rRT-PCR	Negative	c-ELISA	Negative	Haemagglutination inhibition	Negative
54	54	Blood, Oropharyngeal and cloacal swabs	2013-11-19	2013	Safari Park	Gazipur	Pavo muticus	Green peafowl	Healthy	Wild	Adult	Unidentified	Release after sampling	Chattogram Veterinary and Animal Sciences University	Gazipur	Bangladesh	rRT-PCR	Negative	c-ELISA	Negative	Haemagglutination inhibition	Negative
55	55	Blood, Oropharyngeal and cloacal swabs	2013-11-19	2013	Safari Park	Gazipur	Pavo muticus	Green peafowl	Healthy	Wild	Adult	Unidentified	Release after sampling	Chattogram Veterinary and Animal Sciences University	Gazipur	Bangladesh	rRT-PCR	Negative	c-ELISA	Negative	Haemagglutination inhibition	Negative
56	56	Blood, Oropharyngeal and cloacal swabs	2013-11-19	2013	Safari Park	Gazipur	Pavo muticus	Green peafowl	Healthy	Wild	Adult	Unidentified	Release after sampling	Chattogram Veterinary and Animal Sciences University	Gazipur	Bangladesh	rRT-PCR	Negative	c-ELISA	Negative	Haemagglutination inhibition	Negative
57	57	Blood, Oropharyngeal and cloacal swabs	2013-11-19	2013	Safari Park	Gazipur	Dromaius novaehollandiae	Emu	Healthy	Wild	Adult	Unidentified	Release after sampling	Chattogram Veterinary and Animal Sciences University	Gazipur	Bangladesh	rRT-PCR	Negative	c-ELISA	Negative	Haemagglutination inhibition	Negative
58	58	Blood, Oropharyngeal and cloacal swabs	2013-11-19	2013	Safari Park	Gazipur	Dromaius novaehollandiae	Emu	Healthy	Wild	Adult	Unidentified	Release after sampling	Chattogram Veterinary and Animal Sciences University	Gazipur	Bangladesh	rRT-PCR	Negative	c-ELISA	Negative	Haemagglutination inhibition	Negative
59	59	Blood, Oropharyngeal and cloacal swabs	2013-11-19	2013	Safari Park	Gazipur	Dromaius novaehollandiae	Emu	Healthy	Wild	Adult	Unidentified	Release after sampling	Chattogram Veterinary and Animal Sciences University	Gazipur	Bangladesh	rRT-PCR	Negative	c-ELISA	Negative	Haemagglutination inhibition	Negative
60	60	Blood, Oropharyngeal and cloacal swabs	2013-11-19	2013	Safari Park	Gazipur	Dromaius novaehollandiae	Emu	Healthy	Wild	Adult	Unidentified	Release after sampling	Chattogram Veterinary and Animal Sciences University	Gazipur	Bangladesh	rRT-PCR	Negative	c-ELISA	Negative	Haemagglutination inhibition	Negative
61	61	Blood, Oropharyngeal and cloacal swabs	2013-11-19	2013	Safari Park	Gazipur	Dromaius novaehollandiae	Emu	Healthy	Wild	Adult	Unidentified	Release after sampling	Chattogram Veterinary and Animal Sciences University	Gazipur	Bangladesh	rRT-PCR	Negative	c-ELISA	Positive	Haemagglutination inhibition	Negative
62	62	Blood, Oropharyngeal and cloacal swabs	2013-12-26	2013	Safari Park	Cox's Bazar	Chrysolophus pictus	Golden pheasant	Healthy	Wild	Adult	Unidentified	Release after sampling	Chattogram Veterinary and Animal Sciences University	Cox's Bazar	Bangladesh	rRT-PCR	Negative	c-ELISA	Negative	Haemagglutination inhibition	Negative
63	63	Blood, Oropharyngeal and cloacal swabs	2013-12-26	2013	Safari Park	Cox's Bazar	Chrysolophus pictus	Golden pheasant	Healthy	Wild	Adult	Unidentified	Release after sampling	Chattogram Veterinary and Animal Sciences University	Cox's Bazar	Bangladesh	rRT-PCR	Negative	c-ELISA	Negative	Haemagglutination inhibition	Negative
64	64	Blood, Oropharyngeal and cloacal swabs	2013-12-26	2013	Safari Park	Cox's Bazar	Chrysolophus pictus	Golden pheasant	Healthy	Wild	Adult	Unidentified	Release after sampling	Chattogram Veterinary and Animal Sciences University	Cox's Bazar	Bangladesh	rRT-PCR	Negative	c-ELISA	Negative	Haemagglutination inhibition	Negative
65	65	Blood, Oropharyngeal and cloacal swabs	2013-12-26	2013	Safari Park	Cox's Bazar	Chrysolophus pictus	Golden pheasant	Healthy	Wild	Adult	Unidentified	Release after sampling	Chattogram Veterinary and Animal Sciences University	Cox's Bazar	Bangladesh	rRT-PCR	Negative	c-ELISA	Negative	Haemagglutination inhibition	Negative
66	66	Blood, Oropharyngeal and cloacal swabs	2013-12-26	2013	Safari Park	Cox's Bazar	Chrysolophus pictus	Golden pheasant	Healthy	Wild	Adult	Unidentified	Release after sampling	Chattogram Veterinary and Animal Sciences University	Cox's Bazar	Bangladesh	rRT-PCR	Negative	c-ELISA	Negative	Haemagglutination inhibition	Negative
67	67	Blood, Oropharyngeal and cloacal swabs	2013-12-26	2013	Safari Park	Cox's Bazar	Chrysolophus pictus	Golden pheasant	Healthy	Wild	Adult	Unidentified	Release after sampling	Chattogram Veterinary and Animal Sciences University	Cox's Bazar	Bangladesh	rRT-PCR	Negative	c-ELISA	Negative	Haemagglutination inhibition	Negative
68	68	Blood, Oropharyngeal and cloacal swabs	2013-12-26	2013	Safari Park	Cox's Bazar	Numida meleagris	Green peafowl	Healthy	Wild	Adult	Unidentified	Release after sampling	Chattogram Veterinary and Animal Sciences University	Cox's Bazar	Bangladesh	rRT-PCR	Negative	c-ELISA	Negative	Haemagglutination inhibition	Negative
69	69	Blood, Oropharyngeal and cloacal swabs	2013-12-27	2013	Safari Park	Cox's Bazar	Numida meleagris	Green peafowl	Healthy	Wild	Adult	Unidentified	Release after sampling	Chattogram Veterinary and Animal Sciences University	Cox's Bazar	Bangladesh	rRT-PCR	Negative	c-ELISA	Negative	Haemagglutination inhibition	Negative
70	70	Blood, Oropharyngeal and cloacal swabs	2013-12-27	2013	Safari Park	Cox's Bazar	Numida meleagris	Green peafowl	Healthy	Wild	Adult	Unidentified	Release after sampling	Chattogram Veterinary and Animal Sciences University	Cox's Bazar	Bangladesh	rRT-PCR	Negative	c-ELISA	Negative	Haemagglutination inhibition	Negative
71	71	Blood, Oropharyngeal and cloacal swabs	2013-12-27	2013	Safari Park	Cox's Bazar	Numida meleagris	Green peafowl	Healthy	Wild	Adult	Unidentified	Release after sampling	Chattogram Veterinary and Animal Sciences University	Cox's Bazar	Bangladesh	rRT-PCR	Negative	c-ELISA	Negative	Haemagglutination inhibition	Negative
72	72	Blood, Oropharyngeal and cloacal swabs	2013-12-27	2013	Safari Park	Cox's Bazar	Dromaius novaehollandiae	Emu	Healthy	Wild	Adult	Unidentified	Release after sampling	Chattogram Veterinary and Animal Sciences University	Cox's Bazar	Bangladesh	rRT-PCR	Negative	c-ELISA	Positive	Haemagglutination inhibition	H9
73	73	Blood, Oropharyngeal and cloacal swabs	2013-12-27	2013	Safari Park	Cox's Bazar	Dromaius novaehollandiae	Emu	Healthy	Wild	Adult	Unidentified	Release after sampling	Chattogram Veterinary and Animal Sciences University	Cox's Bazar	Bangladesh	rRT-PCR	Negative	c-ELISA	Positive	Haemagglutination inhibition	H9
74	74	Blood, Oropharyngeal and cloacal swabs	2013-12-27	2013	Safari Park	Cox's Bazar	Dromaius novaehollandiae	Emu	Healthy	Wild	Adult	Unidentified	Release after sampling	Chattogram Veterinary and Animal Sciences University	Cox's Bazar	Bangladesh	rRT-PCR	Negative	c-ELISA	Positive	Haemagglutination inhibition	H9
75	75	Blood, Oropharyngeal and cloacal swabs	2013-12-27	2013	Safari Park	Cox's Bazar	Dromaius novaehollandiae	Emu	Healthy	Wild	Adult	Unidentified	Release after sampling	Chattogram Veterinary and Animal Sciences University	Cox's Bazar	Bangladesh	rRT-PCR	Negative	c-ELISA	Negative	Haemagglutination inhibition	Negative
76	76	Blood, Oropharyngeal and cloacal swabs	2014-01-10	2014	Mirpur Zoo	Dhaka	Dromaius novaehollandiae	Emu	Healthy	Wild	Adult	Unidentified	Release after sampling	Chattogram Veterinary and Animal Sciences University	Dhaka	Bangladesh	rRT-PCR	Negative	c-ELISA	Negative	Haemagglutination inhibition	Negative
77	77	Blood, Oropharyngeal and cloacal swabs	2014-01-10	2014	Mirpur Zoo	Dhaka	Dromaius novaehollandiae	Emu	Healthy	Wild	Adult	Unidentified	Release after sampling	Chattogram Veterinary and Animal Sciences University	Dhaka	Bangladesh	rRT-PCR	Negative	c-ELISA	Negative	Haemagglutination inhibition	Negative
78	78	Blood, Oropharyngeal and cloacal swabs	2014-01-10	2014	Mirpur Zoo	Dhaka	Dromaius novaehollandiae	Emu	Healthy	Wild	Adult	Unidentified	Release after sampling	Chattogram Veterinary and Animal Sciences University	Dhaka	Bangladesh	rRT-PCR	Negative	c-ELISA	Negative	Haemagglutination inhibition	Negative
79	79	Blood, Oropharyngeal and cloacal swabs	2014-01-10	2014	Mirpur Zoo	Dhaka	Dromaius novaehollandiae	Emu	Healthy	Wild	Adult	Unidentified	Release after sampling	Chattogram Veterinary and Animal Sciences University	Dhaka	Bangladesh	rRT-PCR	Negative	c-ELISA	Negative	Haemagglutination inhibition	Negative
80	80	Blood, Oropharyngeal and cloacal swabs	2014-01-10	2014	Mirpur Zoo	Dhaka	Buceros bicornis	Raj dhonesh	Healthy	Wild	Adult	Unidentified	Release after sampling	Chattogram Veterinary and Animal Sciences University	Dhaka	Bangladesh	rRT-PCR	Negative	c-ELISA	Negative	Haemagglutination inhibition	Negative
81	81	Blood, Oropharyngeal and cloacal swabs	2014-01-10	2014	Mirpur Zoo	Dhaka	Buceros bicornis	Raj dhonesh	Healthy	Wild	Adult	Unidentified	Release after sampling	Chattogram Veterinary and Animal Sciences University	Dhaka	Bangladesh	rRT-PCR	Negative	c-ELISA	Negative	Haemagglutination inhibition	Negative
82	82	Blood, Oropharyngeal and cloacal swabs	2014-01-10	2014	Mirpur Zoo	Dhaka	Buceros bicornis	Raj dhonesh	Healthy	Wild	Adult	Unidentified	Release after sampling	Chattogram Veterinary and Animal Sciences University	Dhaka	Bangladesh	rRT-PCR	Negative	c-ELISA	Negative	Haemagglutination inhibition	Negative
83	83	Blood, Oropharyngeal and cloacal swabs	2014-01-10	2014	Mirpur Zoo	Dhaka	Pavo muticus	Green peafowl	Healthy	Wild	Adult	Unidentified	Release after sampling	Chattogram Veterinary and Animal Sciences University	Dhaka	Bangladesh	rRT-PCR	Negative	c-ELISA	Negative	Haemagglutination inhibition	Negative
84	84	Blood, Oropharyngeal and cloacal swabs	2014-01-10	2014	Mirpur Zoo	Dhaka	Pavo muticus	Green peafowl	Healthy	Wild	Adult	Unidentified	Release after sampling	Chattogram Veterinary and Animal Sciences University	Dhaka	Bangladesh	rRT-PCR	Negative	c-ELISA	Negative	Haemagglutination inhibition	Negative
85	85	Blood, Oropharyngeal and cloacal swabs	2014-01-10	2014	Mirpur Zoo	Dhaka	Pavo muticus	Green peafowl	Healthy	Wild	Adult	Unidentified	Release after sampling	Chattogram Veterinary and Animal Sciences University	Dhaka	Bangladesh	rRT-PCR	Negative	c-ELISA	Negative	Haemagglutination inhibition	Negative
86	86	Blood, Oropharyngeal and cloacal swabs	2014-01-11	2014	Mirpur Zoo	Dhaka	Pavo muticus	Green peafowl	Healthy	Wild	Adult	Unidentified	Release after sampling	Chattogram Veterinary and Animal Sciences University	Dhaka	Bangladesh	rRT-PCR	Negative	c-ELISA	Negative	Haemagglutination inhibition	Negative
87	87	Blood, Oropharyngeal and cloacal swabs	2014-01-11	2014	Mirpur Zoo	Dhaka	Pavo muticus	Green peafowl	Healthy	Wild	Adult	Unidentified	Release after sampling	Chattogram Veterinary and Animal Sciences University	Dhaka	Bangladesh	rRT-PCR	Negative	c-ELISA	Negative	Haemagglutination inhibition	Negative
88	88	Blood, Oropharyngeal and cloacal swabs	2014-01-11	2014	Mirpur Zoo	Dhaka	Pavo muticus	Green peafowl	Healthy	Wild	Adult	Unidentified	Release after sampling	Chattogram Veterinary and Animal Sciences University	Dhaka	Bangladesh	rRT-PCR	Negative	c-ELISA	Negative	Haemagglutination inhibition	Negative
89	89	Blood, Oropharyngeal and cloacal swabs	2014-01-11	2014	Mirpur Zoo	Dhaka	Pavo muticus	Green peafowl	Healthy	Wild	Adult	Unidentified	Release after sampling	Chattogram Veterinary and Animal Sciences University	Dhaka	Bangladesh	rRT-PCR	Negative	c-ELISA	Negative	Haemagglutination inhibition	Negative
90	90	Blood, Oropharyngeal and cloacal swabs	2014-01-11	2014	Mirpur Zoo	Dhaka	Pavo muticus	Green peafowl	Healthy	Wild	Adult	Unidentified	Release after sampling	Chattogram Veterinary and Animal Sciences University	Dhaka	Bangladesh	rRT-PCR	Negative	c-ELISA	Negative	Haemagglutination inhibition	Negative
91	91	Blood, Oropharyngeal and cloacal swabs	2014-01-11	2014	Mirpur Zoo	Dhaka	Chrysolophus pictus	Golden pheasant	Healthy	Wild	Adult	Unidentified	Release after sampling	Chattogram Veterinary and Animal Sciences University	Dhaka	Bangladesh	rRT-PCR	Negative	c-ELISA	Negative	Haemagglutination inhibition	Negative
92	92	Blood, Oropharyngeal and cloacal swabs	2014-01-11	2014	Mirpur Zoo	Dhaka	Chrysolophus pictus	Golden pheasant	Healthy	Wild	Adult	Unidentified	Release after sampling	Chattogram Veterinary and Animal Sciences University	Dhaka	Bangladesh	rRT-PCR	Negative	c-ELISA	Negative	Haemagglutination inhibition	Negative
93	93	Blood, Oropharyngeal and cloacal swabs	2014-01-11	2014	Mirpur Zoo	Dhaka	Chrysolophus pictus	Golden pheasant	Healthy	Wild	Adult	Unidentified	Release after sampling	Chattogram Veterinary and Animal Sciences University	Dhaka	Bangladesh	rRT-PCR	Negative	c-ELISA	Negative	Haemagglutination inhibition	Negative
94	94	Blood, Oropharyngeal and cloacal swabs	2014-01-12	2014	Mirpur Zoo	Dhaka	Chrysolophus pictus	Golden pheasant	Healthy	Wild	Adult	Unidentified	Release after sampling	Chattogram Veterinary and Animal Sciences University	Dhaka	Bangladesh	rRT-PCR	Negative	c-ELISA	Negative	Haemagglutination inhibition	Negative
95	95	Blood, Oropharyngeal and cloacal swabs	2014-01-12	2014	Mirpur Zoo	Dhaka	Chrysolophus pictus	Golden pheasant	Healthy	Wild	Adult	Unidentified	Release after sampling	Chattogram Veterinary and Animal Sciences University	Dhaka	Bangladesh	rRT-PCR	Negative	c-ELISA	Negative	Haemagglutination inhibition	Negative
96	96	Blood, Oropharyngeal and cloacal swabs	2014-01-12	2014	Mirpur Zoo	Dhaka	Chrysolophus pictus	Golden pheasant	Healthy	Wild	Adult	Unidentified	Release after sampling	Chattogram Veterinary and Animal Sciences University	Dhaka	Bangladesh	rRT-PCR	Negative	c-ELISA	Negative	Haemagglutination inhibition	Negative
97	97	Blood, Oropharyngeal and cloacal swabs	2014-01-12	2014	Mirpur Zoo	Dhaka	Chrysolophus pictus	Golden pheasant	Healthy	Wild	Adult	Unidentified	Release after sampling	Chattogram Veterinary and Animal Sciences University	Dhaka	Bangladesh	rRT-PCR	Negative	c-ELISA	Negative	Haemagglutination inhibition	Negative
98	98	Blood, Oropharyngeal and cloacal swabs	2014-01-12	2014	Mirpur Zoo	Dhaka	Pseudibis papillosa	Red-naped ibis	Healthy	Wild	Adult	Unidentified	Release after sampling	Chattogram Veterinary and Animal Sciences University	Dhaka	Bangladesh	rRT-PCR	Negative	c-ELISA	Positive	Haemagglutination inhibition	H9
99	99	Blood, Oropharyngeal and cloacal swabs	2014-02-02	2014	Safari Park	Cox's Bazar	Pseudibis papillosa	Red-naped ibis	Healthy	Wild	Adult	Unidentified	Release after sampling	Chattogram Veterinary and Animal Sciences University	Cox's Bazar	Bangladesh	rRT-PCR	Negative	c-ELISA	Negative	Haemagglutination inhibition	Negative
100	100	Blood, Oropharyngeal and cloacal swabs	2014-02-02	2014	Safari Park	Cox's Bazar	Pseudibis papillosa	Red-naped ibis	Healthy	Wild	Adult	Unidentified	Release after sampling	Chattogram Veterinary and Animal Sciences University	Cox's Bazar	Bangladesh	rRT-PCR	Negative	c-ELISA	Negative	Haemagglutination inhibition	Negative
101	101	Blood, Oropharyngeal and cloacal swabs	2014-02-02	2014	Safari Park	Cox's Bazar	Pseudibis papillosa	Red-naped ibis	Healthy	Wild	Adult	Unidentified	Release after sampling	Chattogram Veterinary and Animal Sciences University	Cox's Bazar	Bangladesh	rRT-PCR	Negative	c-ELISA	Negative	Haemagglutination inhibition	Negative
102	102	Blood, Oropharyngeal and cloacal swabs	2014-02-02	2014	Safari Park	Cox's Bazar	Pseudibis papillosa	Red-naped ibis	Healthy	Wild	Adult	Unidentified	Release after sampling	Chattogram Veterinary and Animal Sciences University	Cox's Bazar	Bangladesh	rRT-PCR	Negative	c-ELISA	Negative	Haemagglutination inhibition	Negative
103	103	Blood, Oropharyngeal and cloacal swabs	2014-02-02	2014	Safari Park	Cox's Bazar	Pseudibis papillosa	Red-naped ibis	Healthy	Wild	Adult	Unidentified	Release after sampling	Chattogram Veterinary and Animal Sciences University	Cox's Bazar	Bangladesh	rRT-PCR	Negative	c-ELISA	Positive	Haemagglutination inhibition	H9
104	104	Blood, Oropharyngeal and cloacal swabs	2014-02-02	2014	Safari Park	Cox's Bazar	Struthio camelus	Ostrich	Healthy	Wild	Adult	Unidentified	Release after sampling	Chattogram Veterinary and Animal Sciences University	Cox's Bazar	Bangladesh	rRT-PCR	Negative	c-ELISA	Negative	Haemagglutination inhibition	Negative
105	105	Blood, Oropharyngeal and cloacal swabs	2014-02-02	2014	Safari Park	Cox's Bazar	Struthio camelus	Ostrich	Healthy	Wild	Adult	Unidentified	Release after sampling	Chattogram Veterinary and Animal Sciences University	Cox's Bazar	Bangladesh	rRT-PCR	Negative	c-ELISA	Negative	Haemagglutination inhibition	Negative
106	106	Blood, Oropharyngeal and cloacal swabs	2014-02-02	2014	Safari Park	Cox's Bazar	Struthio camelus	Ostrich	Healthy	Wild	Adult	Unidentified	Release after sampling	Chattogram Veterinary and Animal Sciences University	Cox's Bazar	Bangladesh	rRT-PCR	Negative	c-ELISA	Negative	Haemagglutination inhibition	Negative
107	107	Blood, Oropharyngeal and cloacal swabs	2014-02-03	2014	Safari Park	Cox's Bazar	Struthio camelus	Ostrich	Healthy	Wild	Adult	Unidentified	Release after sampling	Chattogram Veterinary and Animal Sciences University	Cox's Bazar	Bangladesh	rRT-PCR	Negative	c-ELISA	Negative	Haemagglutination inhibition	Negative
108	108	Blood, Oropharyngeal and cloacal swabs	2014-02-03	2014	Safari Park	Cox's Bazar	Struthio camelus	Ostrich	Healthy	Wild	Adult	Unidentified	Release after sampling	Chattogram Veterinary and Animal Sciences University	Cox's Bazar	Bangladesh	rRT-PCR	Negative	c-ELISA	Negative	Haemagglutination inhibition	Negative
109	109	Blood, Oropharyngeal and cloacal swabs	2014-02-03	2014	Safari Park	Cox's Bazar	Dromaius novaehollandiae	Emu	Healthy	Wild	Adult	Unidentified	Release after sampling	Chattogram Veterinary and Animal Sciences University	Cox's Bazar	Bangladesh	rRT-PCR	Negative	c-ELISA	Positive	Haemagglutination inhibition	Negative
110	110	Blood, Oropharyngeal and cloacal swabs	2014-02-03	2014	Safari Park	Cox's Bazar	Dromaius novaehollandiae	Emu	Healthy	Wild	Adult	Unidentified	Release after sampling	Chattogram Veterinary and Animal Sciences University	Cox's Bazar	Bangladesh	rRT-PCR	Negative	c-ELISA	Negative	Haemagglutination inhibition	Negative
111	111	Blood, Oropharyngeal and cloacal swabs	2014-02-03	2014	Safari Park	Cox's Bazar	Dromaius novaehollandiae	Emu	Healthy	Wild	Adult	Unidentified	Release after sampling	Chattogram Veterinary and Animal Sciences University	Cox's Bazar	Bangladesh	rRT-PCR	Negative	c-ELISA	Negative	Haemagglutination inhibition	Negative
112	112	Blood, Oropharyngeal and cloacal swabs	2014-02-03	2014	Safari Park	Cox's Bazar	Dromaius novaehollandiae	Emu	Healthy	Wild	Adult	Unidentified	Release after sampling	Chattogram Veterinary and Animal Sciences University	Cox's Bazar	Bangladesh	rRT-PCR	Negative	c-ELISA	Negative	Haemagglutination inhibition	Negative
113	113	Blood, Oropharyngeal and cloacal swabs	2014-02-03	2014	Safari Park	Cox's Bazar	Dromaius novaehollandiae	Emu	Healthy	Wild	Adult	Unidentified	Release after sampling	Chattogram Veterinary and Animal Sciences University	Cox's Bazar	Bangladesh	rRT-PCR	Negative	c-ELISA	Negative	Haemagglutination inhibition	Negative
114	114	Blood, Oropharyngeal and cloacal swabs	2014-02-03	2014	Safari Park	Cox's Bazar	Numida meleagris	Guinea fowl	Healthy	Wild	Adult	Unidentified	Release after sampling	Chattogram Veterinary and Animal Sciences University	Cox's Bazar	Bangladesh	rRT-PCR	Negative	c-ELISA	Negative	Haemagglutination inhibition	Negative
115	115	Blood, Oropharyngeal and cloacal swabs	2014-02-03	2014	Safari Park	Cox's Bazar	Numida meleagris	Guinea fowl	Healthy	Wild	Adult	Unidentified	Release after sampling	Chattogram Veterinary and Animal Sciences University	Cox's Bazar	Bangladesh	rRT-PCR	Negative	c-ELISA	Negative	Haemagglutination inhibition	Negative
116	116	Blood, Oropharyngeal and cloacal swabs	2014-02-03	2014	Safari Park	Cox's Bazar	Numida meleagris	Guinea fowl	Healthy	Wild	Adult	Unidentified	Release after sampling	Chattogram Veterinary and Animal Sciences University	Cox's Bazar	Bangladesh	rRT-PCR	Negative	c-ELISA	Negative	Haemagglutination inhibition	Negative
117	117	Blood, Oropharyngeal and cloacal swabs	2014-02-04	2014	Safari Park	Cox's Bazar	Numida meleagris	Guinea fowl	Healthy	Wild	Adult	Unidentified	Release after sampling	Chattogram Veterinary and Animal Sciences University	Cox's Bazar	Bangladesh	rRT-PCR	Negative	c-ELISA	Positive	Haemagglutination inhibition	Negative
118	118	Blood, Oropharyngeal and cloacal swabs	2014-02-04	2014	Safari Park	Cox's Bazar	Numida meleagris	Guinea fowl	Healthy	Wild	Adult	Unidentified	Release after sampling	Chattogram Veterinary and Animal Sciences University	Cox's Bazar	Bangladesh	rRT-PCR	Negative	c-ELISA	Positive	Haemagglutination inhibition	H9
119	119	Blood, Oropharyngeal and cloacal swabs	2014-02-04	2014	Safari Park	Cox's Bazar	Numida meleagris	Guinea fowl	Healthy	Wild	Adult	Unidentified	Release after sampling	Chattogram Veterinary and Animal Sciences University	Cox's Bazar	Bangladesh	rRT-PCR	Negative	c-ELISA	Negative	Haemagglutination inhibition	Negative
120	120	Blood, Oropharyngeal and cloacal swabs	2014-02-04	2014	Safari Park	Cox's Bazar	Numida meleagris	Guinea fowl	Healthy	Wild	Adult	Unidentified	Release after sampling	Chattogram Veterinary and Animal Sciences University	Cox's Bazar	Bangladesh	rRT-PCR	Negative	c-ELISA	Negative	Haemagglutination inhibition	Negative
121	121	Blood, Oropharyngeal and cloacal swabs	2014-02-04	2014	Safari Park	Cox's Bazar	Numida meleagris	Guinea fowl	Healthy	Wild	Adult	Unidentified	Release after sampling	Chattogram Veterinary and Animal Sciences University	Cox's Bazar	Bangladesh	rRT-PCR	Negative	c-ELISA	Negative	Haemagglutination inhibition	Negative
122	122	Blood, Oropharyngeal and cloacal swabs	2014-02-04	2014	Safari Park	Cox's Bazar	Chrysolophus pictus	Golden pheasant	Healthy	Wild	Adult	Unidentified	Release after sampling	Chattogram Veterinary and Animal Sciences University	Cox's Bazar	Bangladesh	rRT-PCR	Negative	c-ELISA	Negative	Haemagglutination inhibition	Negative
123	123	Blood, Oropharyngeal and cloacal swabs	2014-02-04	2014	Safari Park	Cox's Bazar	Pavo muticus	Green peafowl	Healthy	Wild	Adult	Unidentified	Release after sampling	Chattogram Veterinary and Animal Sciences University	Cox's Bazar	Bangladesh	rRT-PCR	Negative	c-ELISA	Negative	Haemagglutination inhibition	Negative
124	124	Blood, Oropharyngeal and cloacal swabs	2014-02-04	2014	Safari Park	Cox's Bazar	Pavo muticus	Green peafowl	Healthy	Wild	Adult	Unidentified	Release after sampling	Chattogram Veterinary and Animal Sciences University	Cox's Bazar	Bangladesh	rRT-PCR	Negative	c-ELISA	Negative	Haemagglutination inhibition	Negative
125	125	Blood, Oropharyngeal and cloacal swabs	2014-02-04	2014	Safari Park	Cox's Bazar	Buceros bicornis	Raj dhonesh	Healthy	Wild	Adult	Unidentified	Release after sampling	Chattogram Veterinary and Animal Sciences University	Cox's Bazar	Bangladesh	rRT-PCR	Negative	c-ELISA	Negative	Haemagglutination inhibition	Negative
126	126	Blood, Oropharyngeal and cloacal swabs	2014-02-04	2014	Safari Park	Cox's Bazar	Buceros bicornis	Raj dhonesh	Healthy	Wild	Adult	Unidentified	Release after sampling	Chattogram Veterinary and Animal Sciences University	Cox's Bazar	Bangladesh	rRT-PCR	Negative	c-ELISA	Negative	Haemagglutination inhibition	Negative
127	127	Blood, Oropharyngeal and cloacal swabs	2014-02-05	2014	Safari Park	Cox's Bazar	Buceros bicornis	Raj dhonesh	Healthy	Wild	Adult	Unidentified	Release after sampling	Chattogram Veterinary and Animal Sciences University	Cox's Bazar	Bangladesh	rRT-PCR	Negative	c-ELISA	Negative	Haemagglutination inhibition	Negative
128	128	Blood, Oropharyngeal and cloacal swabs	2014-02-05	2014	Safari Park	Cox's Bazar	Buceros bicornis	Raj dhonesh	Healthy	Wild	Adult	Unidentified	Release after sampling	Chattogram Veterinary and Animal Sciences University	Cox's Bazar	Bangladesh	rRT-PCR	Negative	c-ELISA	Negative	Haemagglutination inhibition	Negative
129	129	Blood, Oropharyngeal and cloacal swabs	2014-02-05	2014	Safari Park	Cox's Bazar	Buceros bicornis	Raj dhonesh	Healthy	Wild	Adult	Unidentified	Release after sampling	Chattogram Veterinary and Animal Sciences University	Cox's Bazar	Bangladesh	rRT-PCR	Negative	c-ELISA	Negative	Haemagglutination inhibition	Negative
130	130	Blood, Oropharyngeal and cloacal swabs	2014-02-05	2014	Safari Park	Cox's Bazar	Dromaius novaehollandiae	Emu	Healthy	Wild	Adult	Unidentified	Release after sampling	Chattogram Veterinary and Animal Sciences University	Cox's Bazar	Bangladesh	rRT-PCR	Negative	c-ELISA	Negative	Haemagglutination inhibition	Negative
131	131	Blood, Oropharyngeal and cloacal swabs	2014-02-05	2014	Safari Park	Cox's Bazar	Chrysolophus pictus	Golden pheasant	Healthy	Wild	Adult	Unidentified	Release after sampling	Chattogram Veterinary and Animal Sciences University	Cox's Bazar	Bangladesh	rRT-PCR	Negative	c-ELISA	Negative	Haemagglutination inhibition	Negative
132	132	Blood, Oropharyngeal and cloacal swabs	2014-02-05	2014	Safari Park	Cox's Bazar	Numida meleagris	Guinea fowl	Healthy	Wild	Adult	Unidentified	Release after sampling	Chattogram Veterinary and Animal Sciences University	Cox's Bazar	Bangladesh	rRT-PCR	Negative	c-ELISA	Negative	Haemagglutination inhibition	Negative
133	133	Blood, Oropharyngeal and cloacal swabs	2014-02-05	2014	Safari Park	Cox's Bazar	Numida meleagris	Guinea fowl	Healthy	Wild	Adult	Unidentified	Release after sampling	Chattogram Veterinary and Animal Sciences University	Cox's Bazar	Bangladesh	rRT-PCR	Negative	c-ELISA	Negative	Haemagglutination inhibition	Negative
134	134	Blood, Oropharyngeal and cloacal swabs	2014-02-05	2014	Safari Park	Cox's Bazar	Numida meleagris	Guinea fowl	Healthy	Wild	Adult	Unidentified	Release after sampling	Chattogram Veterinary and Animal Sciences University	Cox's Bazar	Bangladesh	rRT-PCR	Negative	c-ELISA	Negative	Haemagglutination inhibition	Negative
135	135	Blood, Oropharyngeal and cloacal swabs	2014-02-05	2014	Safari Park	Cox's Bazar	Numida meleagris	Guinea fowl	Healthy	Wild	Adult	Unidentified	Release after sampling	Chattogram Veterinary and Animal Sciences University	Cox's Bazar	Bangladesh	rRT-PCR	Negative	c-ELISA	Negative	Haemagglutination inhibition	Negative
136	136	Blood, Oropharyngeal and cloacal swabs	2014-02-05	2014	Safari Park	Cox's Bazar	Numida meleagris	Guinea fowl	Healthy	Wild	Adult	Unidentified	Release after sampling	Chattogram Veterinary and Animal Sciences University	Cox's Bazar	Bangladesh	rRT-PCR	Negative	c-ELISA	Negative	Haemagglutination inhibition	Negative
137	137	Blood, Oropharyngeal and cloacal swabs	2014-02-12	2014	Safari Park	Gazipur	Ara macao	Macaw	Healthy	Wild	Adult	Unidentified	Release after sampling	Chattogram Veterinary and Animal Sciences University	Gazipur	Bangladesh	rRT-PCR	Negative	c-ELISA	Negative	Haemagglutination inhibition	Negative
138	138	Blood, Oropharyngeal and cloacal swabs	2014-02-12	2014	Safari Park	Gazipur	Ara macao	Macaw	Healthy	Wild	Adult	Unidentified	Release after sampling	Chattogram Veterinary and Animal Sciences University	Gazipur	Bangladesh	rRT-PCR	Negative	c-ELISA	Negative	Haemagglutination inhibition	Negative
139	139	Blood, Oropharyngeal and cloacal swabs	2014-02-12	2014	Safari Park	Gazipur	Ara macao	Macaw	Healthy	Wild	Adult	Unidentified	Release after sampling	Chattogram Veterinary and Animal Sciences University	Gazipur	Bangladesh	rRT-PCR	Negative	c-ELISA	Negative	Haemagglutination inhibition	Negative
140	140	Blood, Oropharyngeal and cloacal swabs	2014-02-12	2014	Safari Park	Gazipur	Ara macao	Macaw	Healthy	Wild	Adult	Unidentified	Release after sampling	Chattogram Veterinary and Animal Sciences University	Gazipur	Bangladesh	rRT-PCR	Negative	c-ELISA	Negative	Haemagglutination inhibition	Negative
141	141	Blood, Oropharyngeal and cloacal swabs	2014-02-12	2014	Safari Park	Gazipur	Ara macao	Macaw	Healthy	Wild	Adult	Unidentified	Release after sampling	Chattogram Veterinary and Animal Sciences University	Gazipur	Bangladesh	rRT-PCR	Negative	c-ELISA	Negative	Haemagglutination inhibition	Negative
142	142	Blood, Oropharyngeal and cloacal swabs	2014-02-12	2014	Safari Park	Gazipur	Ara macao	Macaw	Healthy	Wild	Adult	Unidentified	Release after sampling	Chattogram Veterinary and Animal Sciences University	Gazipur	Bangladesh	rRT-PCR	Negative	c-ELISA	Negative	Haemagglutination inhibition	Negative
143	143	Blood, Oropharyngeal and cloacal swabs	2014-02-12	2014	Safari Park	Gazipur	Ara macao	Macaw	Healthy	Wild	Adult	Unidentified	Release after sampling	Chattogram Veterinary and Animal Sciences University	Gazipur	Bangladesh	rRT-PCR	Negative	c-ELISA	Negative	Haemagglutination inhibition	Negative
144	144	Blood, Oropharyngeal and cloacal swabs	2014-02-12	2014	Safari Park	Gazipur	Ara macao	Macaw	Healthy	Wild	Adult	Unidentified	Release after sampling	Chattogram Veterinary and Animal Sciences University	Gazipur	Bangladesh	rRT-PCR	Negative	c-ELISA	Negative	Haemagglutination inhibition	Negative
145	145	Blood, Oropharyngeal and cloacal swabs	2014-02-12	2014	Safari Park	Gazipur	Ara macao	Macaw	Healthy	Wild	Adult	Unidentified	Release after sampling	Chattogram Veterinary and Animal Sciences University	Gazipur	Bangladesh	rRT-PCR	Negative	c-ELISA	Negative	Haemagglutination inhibition	Negative
146	146	Blood, Oropharyngeal and cloacal swabs	2014-02-13	2014	Safari Park	Gazipur	Ara macao	Macaw	Healthy	Wild	Adult	Unidentified	Release after sampling	Chattogram Veterinary and Animal Sciences University	Gazipur	Bangladesh	rRT-PCR	Negative	c-ELISA	Negative	Haemagglutination inhibition	Negative
147	147	Blood, Oropharyngeal and cloacal swabs	2014-02-13	2014	Safari Park	Gazipur	Ara macao	Macaw	Healthy	Wild	Adult	Unidentified	Release after sampling	Chattogram Veterinary and Animal Sciences University	Gazipur	Bangladesh	rRT-PCR	Negative	c-ELISA	Negative	Haemagglutination inhibition	Negative
148	148	Blood, Oropharyngeal and cloacal swabs	2014-02-13	2014	Safari Park	Gazipur	Ara macao	Macaw	Healthy	Wild	Adult	Unidentified	Release after sampling	Chattogram Veterinary and Animal Sciences University	Gazipur	Bangladesh	rRT-PCR	Negative	c-ELISA	Negative	Haemagglutination inhibition	Negative
149	149	Blood, Oropharyngeal and cloacal swabs	2014-02-13	2014	Safari Park	Gazipur	Ara macao	Macaw	Healthy	Wild	Adult	Unidentified	Release after sampling	Chattogram Veterinary and Animal Sciences University	Gazipur	Bangladesh	rRT-PCR	Negative	c-ELISA	Negative	Haemagglutination inhibition	Negative
150	150	Blood, Oropharyngeal and cloacal swabs	2014-02-13	2014	Safari Park	Gazipur	Ara macao	Macaw	Healthy	Wild	Adult	Unidentified	Release after sampling	Chattogram Veterinary and Animal Sciences University	Gazipur	Bangladesh	rRT-PCR	Negative	c-ELISA	Negative	Haemagglutination inhibition	Negative
151	151	Blood, Oropharyngeal and cloacal swabs	2014-02-13	2014	Safari Park	Gazipur	Ara macao	Macaw	Healthy	Wild	Adult	Unidentified	Release after sampling	Chattogram Veterinary and Animal Sciences University	Gazipur	Bangladesh	rRT-PCR	Negative	c-ELISA	Negative	Haemagglutination inhibition	Negative
152	152	Blood, Oropharyngeal and cloacal swabs	2014-02-13	2014	Safari Park	Gazipur	Ara macao	Macaw	Healthy	Wild	Adult	Unidentified	Release after sampling	Chattogram Veterinary and Animal Sciences University	Gazipur	Bangladesh	rRT-PCR	Negative	c-ELISA	Negative	Haemagglutination inhibition	Negative
153	153	Blood, Oropharyngeal and cloacal swabs	2014-02-13	2014	Safari Park	Gazipur	Ara macao	Macaw	Healthy	Wild	Adult	Unidentified	Release after sampling	Chattogram Veterinary and Animal Sciences University	Gazipur	Bangladesh	rRT-PCR	Negative	c-ELISA	Negative	Haemagglutination inhibition	Negative
154	154	Blood, Oropharyngeal and cloacal swabs	2014-02-13	2014	Safari Park	Gazipur	Ara macao	Macaw	Healthy	Wild	Adult	Unidentified	Release after sampling	Chattogram Veterinary and Animal Sciences University	Gazipur	Bangladesh	rRT-PCR	Negative	c-ELISA	Negative	Haemagglutination inhibition	Negative
155	155	Blood, Oropharyngeal and cloacal swabs	2014-02-13	2014	Safari Park	Gazipur	Ara macao	Macaw	Healthy	Wild	Adult	Unidentified	Release after sampling	Chattogram Veterinary and Animal Sciences University	Gazipur	Bangladesh	rRT-PCR	Negative	c-ELISA	Negative	Haemagglutination inhibition	Negative
156	156	Blood, Oropharyngeal and cloacal swabs	2014-02-13	2014	Safari Park	Gazipur	Ara macao	Macaw	Healthy	Wild	Adult	Unidentified	Release after sampling	Chattogram Veterinary and Animal Sciences University	Gazipur	Bangladesh	rRT-PCR	Negative	c-ELISA	Negative	Haemagglutination inhibition	Negative
157	157	Blood, Oropharyngeal and cloacal swabs	2014-02-14	2014	Safari Park	Gazipur	Ara macao	Macaw	Healthy	Wild	Adult	Unidentified	Release after sampling	Chattogram Veterinary and Animal Sciences University	Gazipur	Bangladesh	rRT-PCR	Negative	c-ELISA	Negative	Haemagglutination inhibition	Negative
158	158	Blood, Oropharyngeal and cloacal swabs	2014-02-14	2014	Safari Park	Gazipur	Ara macao	Macaw	Healthy	Wild	Adult	Unidentified	Release after sampling	Chattogram Veterinary and Animal Sciences University	Gazipur	Bangladesh	rRT-PCR	Negative	c-ELISA	Negative	Haemagglutination inhibition	Negative
159	159	Blood, Oropharyngeal and cloacal swabs	2014-02-14	2014	Safari Park	Gazipur	Ara macao	Macaw	Healthy	Wild	Adult	Unidentified	Release after sampling	Chattogram Veterinary and Animal Sciences University	Gazipur	Bangladesh	rRT-PCR	Negative	c-ELISA	Negative	Haemagglutination inhibition	Negative
160	160	Blood, Oropharyngeal and cloacal swabs	2014-02-14	2014	Safari Park	Gazipur	Ara macao	Macaw	Healthy	Wild	Adult	Unidentified	Release after sampling	Chattogram Veterinary and Animal Sciences University	Gazipur	Bangladesh	rRT-PCR	Negative	c-ELISA	Negative	Haemagglutination inhibition	Negative
161	161	Blood, Oropharyngeal and cloacal swabs	2014-02-14	2014	Safari Park	Gazipur	Ara macao	Macaw	Healthy	Wild	Adult	Unidentified	Release after sampling	Chattogram Veterinary and Animal Sciences University	Gazipur	Bangladesh	rRT-PCR	Negative	c-ELISA	Negative	Haemagglutination inhibition	Negative
162	162	Blood, Oropharyngeal and cloacal swabs	2014-02-14	2014	Safari Park	Gazipur	Ara macao	Macaw	Healthy	Wild	Adult	Unidentified	Release after sampling	Chattogram Veterinary and Animal Sciences University	Gazipur	Bangladesh	rRT-PCR	Negative	c-ELISA	Negative	Haemagglutination inhibition	Negative
163	163	Blood, Oropharyngeal and cloacal swabs	2014-02-14	2014	Safari Park	Gazipur	Ara macao	Macaw	Healthy	Wild	Adult	Unidentified	Release after sampling	Chattogram Veterinary and Animal Sciences University	Gazipur	Bangladesh	rRT-PCR	Negative	c-ELISA	Negative	Haemagglutination inhibition	Negative
164	164	Blood, Oropharyngeal and cloacal swabs	2014-02-14	2014	Safari Park	Gazipur	Ara macao	Macaw	Healthy	Wild	Adult	Unidentified	Release after sampling	Chattogram Veterinary and Animal Sciences University	Gazipur	Bangladesh	rRT-PCR	Negative	c-ELISA	Negative	Haemagglutination inhibition	Negative
165	165	Blood, Oropharyngeal and cloacal swabs	2014-02-14	2014	Safari Park	Gazipur	Ara macao	Macaw	Healthy	Wild	Adult	Unidentified	Release after sampling	Chattogram Veterinary and Animal Sciences University	Gazipur	Bangladesh	rRT-PCR	Negative	c-ELISA	Negative	Haemagglutination inhibition	Negative
166	166	Blood, Oropharyngeal and cloacal swabs	2014-02-14	2014	Safari Park	Gazipur	Ara macao	Macaw	Healthy	Wild	Adult	Unidentified	Release after sampling	Chattogram Veterinary and Animal Sciences University	Gazipur	Bangladesh	rRT-PCR	Negative	c-ELISA	Negative	Haemagglutination inhibition	Negative
167	167	Blood, Oropharyngeal and cloacal swabs	2014-02-14	2014	Safari Park	Gazipur	Struthio camelus	Ostrich	Healthy	Wild	Adult	Unidentified	Release after sampling	Chattogram Veterinary and Animal Sciences University	Gazipur	Bangladesh	rRT-PCR	Negative	c-ELISA	Negative	Haemagglutination inhibition	Negative
168	168	Blood, Oropharyngeal and cloacal swabs	2014-02-15	2014	Safari Park	Gazipur	Struthio camelus	Ostrich	Healthy	Wild	Adult	Unidentified	Release after sampling	Chattogram Veterinary and Animal Sciences University	Gazipur	Bangladesh	rRT-PCR	Negative	c-ELISA	Negative	Haemagglutination inhibition	Negative
169	169	Blood, Oropharyngeal and cloacal swabs	2014-02-15	2014	Safari Park	Gazipur	Struthio camelus	Ostrich	Healthy	Wild	Adult	Unidentified	Release after sampling	Chattogram Veterinary and Animal Sciences University	Gazipur	Bangladesh	rRT-PCR	Negative	c-ELISA	Negative	Haemagglutination inhibition	Negative
170	170	Blood, Oropharyngeal and cloacal swabs	2014-02-15	2014	Safari Park	Gazipur	Struthio camelus	Ostrich	Healthy	Wild	Adult	Unidentified	Release after sampling	Chattogram Veterinary and Animal Sciences University	Gazipur	Bangladesh	rRT-PCR	Negative	c-ELISA	Negative	Haemagglutination inhibition	Negative
171	171	Blood, Oropharyngeal and cloacal swabs	2014-02-15	2014	Safari Park	Gazipur	Struthio camelus	Ostrich	Healthy	Wild	Adult	Unidentified	Release after sampling	Chattogram Veterinary and Animal Sciences University	Gazipur	Bangladesh	rRT-PCR	Negative	c-ELISA	Negative	Haemagglutination inhibition	Negative
172	172	Blood, Oropharyngeal and cloacal swabs	2014-02-15	2014	Safari Park	Gazipur	Struthio camelus	Ostrich	Healthy	Wild	Adult	Unidentified	Release after sampling	Chattogram Veterinary and Animal Sciences University	Gazipur	Bangladesh	rRT-PCR	Negative	c-ELISA	Negative	Haemagglutination inhibition	Negative
173	173	Blood, Oropharyngeal and cloacal swabs	2014-02-15	2014	Safari Park	Gazipur	Struthio camelus	Ostrich	Healthy	Wild	Adult	Unidentified	Release after sampling	Chattogram Veterinary and Animal Sciences University	Gazipur	Bangladesh	rRT-PCR	Negative	c-ELISA	Negative	Haemagglutination inhibition	Negative
174	174	Blood, Oropharyngeal and cloacal swabs	2014-02-15	2014	Safari Park	Gazipur	Struthio camelus	Ostrich	Healthy	Wild	Adult	Unidentified	Release after sampling	Chattogram Veterinary and Animal Sciences University	Gazipur	Bangladesh	rRT-PCR	Negative	c-ELISA	Negative	Haemagglutination inhibition	Negative
175	175	Blood, Oropharyngeal and cloacal swabs	2014-02-15	2014	Safari Park	Gazipur	Struthio camelus	Ostrich	Healthy	Wild	Adult	Unidentified	Release after sampling	Chattogram Veterinary and Animal Sciences University	Gazipur	Bangladesh	rRT-PCR	Negative	c-ELISA	Negative	Haemagglutination inhibition	Negative
176	176	Blood, Oropharyngeal and cloacal swabs	2014-02-15	2014	Safari Park	Gazipur	Struthio camelus	Ostrich	Healthy	Wild	Adult	Unidentified	Release after sampling	Chattogram Veterinary and Animal Sciences University	Gazipur	Bangladesh	rRT-PCR	Negative	c-ELISA	Negative	Haemagglutination inhibition	Negative
177	177	Blood, Oropharyngeal and cloacal swabs	2014-02-15	2014	Safari Park	Gazipur	Struthio camelus	Ostrich	Healthy	Wild	Adult	Unidentified	Release after sampling	Chattogram Veterinary and Animal Sciences University	Gazipur	Bangladesh	rRT-PCR	Negative	c-ELISA	Negative	Haemagglutination inhibition	Negative
178	178	Blood, Oropharyngeal and cloacal swabs	2014-02-15	2014	Safari Park	Gazipur	Struthio camelus	Ostrich	Healthy	Wild	Adult	Unidentified	Release after sampling	Chattogram Veterinary and Animal Sciences University	Gazipur	Bangladesh	rRT-PCR	Negative	c-ELISA	Negative	Haemagglutination inhibition	Negative
179	179	Blood, Oropharyngeal and cloacal swabs	2014-02-15	2014	Safari Park	Gazipur	Buceros bicornis	Raj dhonesh	Healthy	Wild	Adult	Unidentified	Release after sampling	Chattogram Veterinary and Animal Sciences University	Gazipur	Bangladesh	rRT-PCR	Negative	c-ELISA	Negative	Haemagglutination inhibition	Negative
180	180	Blood, Oropharyngeal and cloacal swabs	2014-02-15	2014	Safari Park	Gazipur	Buceros bicornis	Raj dhonesh	Healthy	Wild	Adult	Unidentified	Release after sampling	Chattogram Veterinary and Animal Sciences University	Gazipur	Bangladesh	rRT-PCR	Negative	c-ELISA	Negative	Haemagglutination inhibition	Negative
181	181	Blood, Oropharyngeal and cloacal swabs	2014-02-15	2014	Safari Park	Gazipur	Buceros bicornis	Raj dhonesh	Healthy	Wild	Adult	Unidentified	Release after sampling	Chattogram Veterinary and Animal Sciences University	Gazipur	Bangladesh	rRT-PCR	Negative	c-ELISA	Negative	Haemagglutination inhibition	Negative
182	182	Blood, Oropharyngeal and cloacal swabs	2014-02-15	2014	Safari Park	Gazipur	Buceros bicornis	Raj dhonesh	Healthy	Wild	Adult	Unidentified	Release after sampling	Chattogram Veterinary and Animal Sciences University	Gazipur	Bangladesh	rRT-PCR	Negative	c-ELISA	Negative	Haemagglutination inhibition	Negative
183	183	Blood, Oropharyngeal and cloacal swabs	2014-02-15	2014	Safari Park	Gazipur	Buceros bicornis	Raj dhonesh	Healthy	Wild	Adult	Unidentified	Release after sampling	Chattogram Veterinary and Animal Sciences University	Gazipur	Bangladesh	rRT-PCR	Negative	c-ELISA	Negative	Haemagglutination inhibition	Negative
184	184	Blood, Oropharyngeal and cloacal swabs	2014-02-15	2014	Safari Park	Gazipur	Buceros bicornis	Raj dhonesh	Healthy	Wild	Adult	Unidentified	Release after sampling	Chattogram Veterinary and Animal Sciences University	Gazipur	Bangladesh	rRT-PCR	Negative	c-ELISA	Negative	Haemagglutination inhibition	Negative
185	185	Blood, Oropharyngeal and cloacal swabs	2014-02-16	2014	Safari Park	Gazipur	Dromaius novaehollandiae	Emu	Healthy	Wild	Adult	Unidentified	Release after sampling	Chattogram Veterinary and Animal Sciences University	Gazipur	Bangladesh	rRT-PCR	Negative	c-ELISA	Negative	Haemagglutination inhibition	Negative
186	186	Blood, Oropharyngeal and cloacal swabs	2014-02-16	2014	Safari Park	Gazipur	Dromaius novaehollandiae	Emu	Healthy	Wild	Adult	Unidentified	Release after sampling	Chattogram Veterinary and Animal Sciences University	Gazipur	Bangladesh	rRT-PCR	Negative	c-ELISA	Negative	Haemagglutination inhibition	Negative
187	187	Blood, Oropharyngeal and cloacal swabs	2014-02-16	2014	Safari Park	Gazipur	Dromaius novaehollandiae	Emu	Healthy	Wild	Adult	Unidentified	Release after sampling	Chattogram Veterinary and Animal Sciences University	Gazipur	Bangladesh	rRT-PCR	Negative	c-ELISA	Positive	Haemagglutination inhibition	H9
188	188	Blood, Oropharyngeal and cloacal swabs	2014-02-16	2014	Safari Park	Gazipur	Dromaius novaehollandiae	Emu	Healthy	Wild	Adult	Unidentified	Release after sampling	Chattogram Veterinary and Animal Sciences University	Gazipur	Bangladesh	rRT-PCR	Negative	c-ELISA	Negative	Haemagglutination inhibition	Negative
189	189	Blood, Oropharyngeal and cloacal swabs	2014-02-16	2014	Safari Park	Gazipur	Chrysolophus pictus	Golden pheasant	Healthy	Wild	Adult	Unidentified	Release after sampling	Chattogram Veterinary and Animal Sciences University	Gazipur	Bangladesh	rRT-PCR	Negative	c-ELISA	Negative	Haemagglutination inhibition	Negative
190	190	Blood, Oropharyngeal and cloacal swabs	2014-02-16	2014	Safari Park	Gazipur	Pavo muticus	Green peafowl	Healthy	Wild	Adult	Unidentified	Release after sampling	Chattogram Veterinary and Animal Sciences University	Gazipur	Bangladesh	rRT-PCR	Negative	c-ELISA	Negative	Haemagglutination inhibition	Negative
191	191	Blood, Oropharyngeal and cloacal swabs	2014-02-16	2014	Safari Park	Gazipur	Pavo muticus	Green peafowl	Healthy	Wild	Adult	Unidentified	Release after sampling	Chattogram Veterinary and Animal Sciences University	Gazipur	Bangladesh	rRT-PCR	Negative	c-ELISA	Negative	Haemagglutination inhibition	Negative
192	192	Blood, Oropharyngeal and cloacal swabs	2014-02-16	2014	Safari Park	Gazipur	Pavo muticus	Green peafowl	Healthy	Wild	Adult	Unidentified	Release after sampling	Chattogram Veterinary and Animal Sciences University	Gazipur	Bangladesh	rRT-PCR	Negative	c-ELISA	Negative	Haemagglutination inhibition	Negative
193	193	Blood, Oropharyngeal and cloacal swabs	2014-02-16	2014	Safari Park	Gazipur	Pavo muticus	Green peafowl	Healthy	Wild	Adult	Unidentified	Release after sampling	Chattogram Veterinary and Animal Sciences University	Gazipur	Bangladesh	rRT-PCR	Negative	c-ELISA	Negative	Haemagglutination inhibition	Negative
194	194	Blood, Oropharyngeal and cloacal swabs	2014-02-16	2014	Safari Park	Gazipur	Chrysolophus pictus	Golden pheasant	Healthy	Wild	Adult	Unidentified	Release after sampling	Chattogram Veterinary and Animal Sciences University	Gazipur	Bangladesh	rRT-PCR	Negative	c-ELISA	Negative	Haemagglutination inhibition	Negative
195	195	Blood, Oropharyngeal and cloacal swabs	2014-02-16	2014	Safari Park	Gazipur	Chrysolophus pictus	Golden pheasant	Healthy	Wild	Adult	Unidentified	Release after sampling	Chattogram Veterinary and Animal Sciences University	Gazipur	Bangladesh	rRT-PCR	Negative	c-ELISA	Negative	Haemagglutination inhibition	Negative
196	196	Blood, Oropharyngeal and cloacal swabs	2014-02-16	2014	Safari Park	Gazipur	Chrysolophus pictus	Golden pheasant	Healthy	Wild	Adult	Unidentified	Release after sampling	Chattogram Veterinary and Animal Sciences University	Gazipur	Bangladesh	rRT-PCR	Negative	c-ELISA	Positive	Haemagglutination inhibition	H9
197	197	Blood, Oropharyngeal and cloacal swabs	2014-02-16	2014	Safari Park	Gazipur	Chrysolophus pictus	Golden pheasant	Healthy	Wild	Adult	Unidentified	Release after sampling	Chattogram Veterinary and Animal Sciences University	Gazipur	Bangladesh	rRT-PCR	Negative	c-ELISA	Positive	Haemagglutination inhibition	Negative
198	198	Blood, Oropharyngeal and cloacal swabs	2014-02-17	2014	Safari Park	Gazipur	Chrysolophus pictus	Golden pheasant	Healthy	Wild	Adult	Unidentified	Release after sampling	Chattogram Veterinary and Animal Sciences University	Gazipur	Bangladesh	rRT-PCR	Negative	c-ELISA	Negative	Haemagglutination inhibition	Negative
199	199	Blood, Oropharyngeal and cloacal swabs	2014-02-17	2014	Safari Park	Gazipur	Pavo muticus	Green peafowl	Healthy	Wild	Adult	Unidentified	Release after sampling	Chattogram Veterinary and Animal Sciences University	Gazipur	Bangladesh	rRT-PCR	Negative	c-ELISA	Negative	Haemagglutination inhibition	Negative
200	200	Blood, Oropharyngeal and cloacal swabs	2014-02-17	2014	Safari Park	Gazipur	Pavo muticus	Green peafowl	Healthy	Wild	Adult	Unidentified	Release after sampling	Chattogram Veterinary and Animal Sciences University	Gazipur	Bangladesh	rRT-PCR	Negative	c-ELISA	Negative	Haemagglutination inhibition	Negative
201	201	Blood, Oropharyngeal and cloacal swabs	2014-02-17	2014	Safari Park	Gazipur	Pavo muticus	Green peafowl	Healthy	Wild	Adult	Unidentified	Release after sampling	Chattogram Veterinary and Animal Sciences University	Gazipur	Bangladesh	rRT-PCR	Negative	c-ELISA	Positive	Haemagglutination inhibition	H9
202	202	Blood, Oropharyngeal and cloacal swabs	2014-02-17	2014	Safari Park	Gazipur	Pavo muticus	Green peafowl	Healthy	Wild	Adult	Unidentified	Release after sampling	Chattogram Veterinary and Animal Sciences University	Gazipur	Bangladesh	rRT-PCR	Negative	c-ELISA	Negative	Haemagglutination inhibition	Negative
203	203	Blood, Oropharyngeal and cloacal swabs	2014-02-17	2014	Safari Park	Gazipur	Pavo muticus	Green peafowl	Healthy	Wild	Adult	Unidentified	Release after sampling	Chattogram Veterinary and Animal Sciences University	Gazipur	Bangladesh	rRT-PCR	Negative	c-ELISA	Negative	Haemagglutination inhibition	Negative
204	204	Blood, Oropharyngeal and cloacal swabs	2014-02-17	2014	Safari Park	Gazipur	Pavo muticus	Green peafowl	Healthy	Wild	Adult	Unidentified	Release after sampling	Chattogram Veterinary and Animal Sciences University	Gazipur	Bangladesh	rRT-PCR	Negative	c-ELISA	Negative	Haemagglutination inhibition	Negative
205	205	Blood, Oropharyngeal and cloacal swabs	2014-02-17	2014	Safari Park	Gazipur	Pavo muticus	Green peafowl	Healthy	Wild	Adult	Unidentified	Release after sampling	Chattogram Veterinary and Animal Sciences University	Gazipur	Bangladesh	rRT-PCR	Negative	c-ELISA	Negative	Haemagglutination inhibition	Negative
206	206	Blood, Oropharyngeal and cloacal swabs	2014-02-17	2014	Safari Park	Gazipur	Pavo muticus	Green peafowl	Healthy	Wild	Adult	Unidentified	Release after sampling	Chattogram Veterinary and Animal Sciences University	Gazipur	Bangladesh	rRT-PCR	Negative	c-ELISA	Negative	Haemagglutination inhibition	Negative
207	207	Blood, Oropharyngeal and cloacal swabs	2014-02-17	2014	Safari Park	Gazipur	Chrysolophus pictus	Golden pheasant	Healthy	Wild	Adult	Unidentified	Release after sampling	Chattogram Veterinary and Animal Sciences University	Gazipur	Bangladesh	rRT-PCR	Negative	c-ELISA	Positive	Haemagglutination inhibition	H9
208	208	Blood, Oropharyngeal and cloacal swabs	2014-02-17	2014	Safari Park	Gazipur	Chrysolophus pictus	Golden pheasant	Healthy	Wild	Adult	Unidentified	Release after sampling	Chattogram Veterinary and Animal Sciences University	Gazipur	Bangladesh	rRT-PCR	Negative	c-ELISA	Positive	Haemagglutination inhibition	Negative
209	209	Blood, Oropharyngeal and cloacal swabs	2014-02-17	2014	Safari Park	Gazipur	Chrysolophus pictus	Golden pheasant	Healthy	Wild	Adult	Unidentified	Release after sampling	Chattogram Veterinary and Animal Sciences University	Gazipur	Bangladesh	rRT-PCR	Negative	c-ELISA	Negative	Haemagglutination inhibition	Negative
210	210	Blood, Oropharyngeal and cloacal swabs	2014-02-17	2014	Safari Park	Gazipur	Pavo muticus	Green peafowl	Healthy	Wild	Adult	Unidentified	Release after sampling	Chattogram Veterinary and Animal Sciences University	Gazipur	Bangladesh	rRT-PCR	Negative	c-ELISA	Negative	Haemagglutination inhibition	Negative
211	211	Blood, Oropharyngeal and cloacal swabs	2014-02-18	2014	Safari Park	Gazipur	Pavo muticus	Green peafowl	Healthy	Wild	Adult	Unidentified	Release after sampling	Chattogram Veterinary and Animal Sciences University	Gazipur	Bangladesh	rRT-PCR	Negative	c-ELISA	Negative	Haemagglutination inhibition	Negative
212	212	Blood, Oropharyngeal and cloacal swabs	2014-02-18	2014	Safari Park	Gazipur	Numida meleagris	Guinea fowl	Healthy	Wild	Adult	Unidentified	Release after sampling	Chattogram Veterinary and Animal Sciences University	Gazipur	Bangladesh	rRT-PCR	Negative	c-ELISA	Negative	Haemagglutination inhibition	Negative
213	213	Blood, Oropharyngeal and cloacal swabs	2014-02-18	2014	Safari Park	Gazipur	Numida meleagris	Guinea fowl	Healthy	Wild	Adult	Unidentified	Release after sampling	Chattogram Veterinary and Animal Sciences University	Gazipur	Bangladesh	rRT-PCR	Negative	c-ELISA	Negative	Haemagglutination inhibition	Negative
214	214	Blood, Oropharyngeal and cloacal swabs	2014-02-18	2014	Safari Park	Gazipur	Numida meleagris	Guinea fowl	Healthy	Wild	Adult	Unidentified	Release after sampling	Chattogram Veterinary and Animal Sciences University	Gazipur	Bangladesh	rRT-PCR	Negative	c-ELISA	Positive	Haemagglutination inhibition	H9
215	215	Blood, Oropharyngeal and cloacal swabs	2014-02-18	2014	Safari Park	Gazipur	Numida meleagris	Guinea fowl	Healthy	Wild	Adult	Unidentified	Release after sampling	Chattogram Veterinary and Animal Sciences University	Gazipur	Bangladesh	rRT-PCR	Negative	c-ELISA	Negative	Haemagglutination inhibition	Negative
216	216	Blood, Oropharyngeal and cloacal swabs	2014-02-18	2014	Safari Park	Gazipur	Numida meleagris	Guinea fowl	Healthy	Wild	Adult	Unidentified	Release after sampling	Chattogram Veterinary and Animal Sciences University	Gazipur	Bangladesh	rRT-PCR	Negative	c-ELISA	Negative	Haemagglutination inhibition	Negative
217	217	Blood, Oropharyngeal and cloacal swabs	2014-02-18	2014	Safari Park	Gazipur	Numida meleagris	Guinea fowl	Healthy	Wild	Adult	Unidentified	Release after sampling	Chattogram Veterinary and Animal Sciences University	Gazipur	Bangladesh	rRT-PCR	Negative	c-ELISA	Negative	Haemagglutination inhibition	Negative
218	218	Blood, Oropharyngeal and cloacal swabs	2014-02-18	2014	Safari Park	Gazipur	Pseudibis papillosa	Red-naped ibis	Healthy	Wild	Adult	Unidentified	Release after sampling	Chattogram Veterinary and Animal Sciences University	Gazipur	Bangladesh	rRT-PCR	Negative	c-ELISA	Negative	Haemagglutination inhibition	Negative
219	219	Blood, Oropharyngeal and cloacal swabs	2014-02-18	2014	Safari Park	Gazipur	Pseudibis papillosa	Red-naped ibis	Healthy	Wild	Adult	Unidentified	Release after sampling	Chattogram Veterinary and Animal Sciences University	Gazipur	Bangladesh	rRT-PCR	Negative	c-ELISA	Negative	Haemagglutination inhibition	Negative
220	220	Blood, Oropharyngeal and cloacal swabs	2014-02-18	2014	Safari Park	Gazipur	Pseudibis papillosa	Red-naped ibis	Healthy	Wild	Adult	Unidentified	Release after sampling	Chattogram Veterinary and Animal Sciences University	Gazipur	Bangladesh	rRT-PCR	Negative	c-ELISA	Negative	Haemagglutination inhibition	Negative
221	221	Blood, Oropharyngeal and cloacal swabs	2014-02-19	2014	Safari Park	Gazipur	Pseudibis papillosa	Red-naped ibis	Healthy	Wild	Adult	Unidentified	Release after sampling	Chattogram Veterinary and Animal Sciences University	Gazipur	Bangladesh	rRT-PCR	Negative	c-ELISA	Negative	Haemagglutination inhibition	Negative
222	222	Blood, Oropharyngeal and cloacal swabs	2014-02-19	2014	Safari Park	Gazipur	Pseudibis papillosa	Red-naped ibis	Healthy	Wild	Adult	Unidentified	Release after sampling	Chattogram Veterinary and Animal Sciences University	Gazipur	Bangladesh	rRT-PCR	Negative	c-ELISA	Negative	Haemagglutination inhibition	Negative
223	223	Blood, Oropharyngeal and cloacal swabs	2014-02-19	2014	Safari Park	Gazipur	Pseudibis papillosa	Red-naped ibis	Healthy	Wild	Adult	Unidentified	Release after sampling	Chattogram Veterinary and Animal Sciences University	Gazipur	Bangladesh	rRT-PCR	Negative	c-ELISA	Negative	Haemagglutination inhibition	Negative
224	224	Blood, Oropharyngeal and cloacal swabs	2014-02-19	2014	Safari Park	Gazipur	Pseudibis papillosa	Red-naped ibis	Healthy	Wild	Adult	Unidentified	Release after sampling	Chattogram Veterinary and Animal Sciences University	Gazipur	Bangladesh	rRT-PCR	Negative	c-ELISA	Negative	Haemagglutination inhibition	Negative
225	225	Blood, Oropharyngeal and cloacal swabs	2014-02-19	2014	Safari Park	Gazipur	Pseudibis papillosa	Red-naped ibis	Healthy	Wild	Adult	Unidentified	Release after sampling	Chattogram Veterinary and Animal Sciences University	Gazipur	Bangladesh	rRT-PCR	Negative	c-ELISA	Negative	Haemagglutination inhibition	Negative
226	226	Blood, Oropharyngeal and cloacal swabs	2014-02-19	2014	Safari Park	Gazipur	Pseudibis papillosa	Red-naped ibis	Healthy	Wild	Adult	Unidentified	Release after sampling	Chattogram Veterinary and Animal Sciences University	Gazipur	Bangladesh	rRT-PCR	Negative	c-ELISA	Negative	Haemagglutination inhibition	Negative
227	227	Blood, Oropharyngeal and cloacal swabs	2014-02-19	2014	Safari Park	Gazipur	Pseudibis papillosa	Red-naped ibis	Healthy	Wild	Adult	Unidentified	Release after sampling	Chattogram Veterinary and Animal Sciences University	Gazipur	Bangladesh	rRT-PCR	Negative	c-ELISA	Negative	Haemagglutination inhibition	Negative
228	228	Blood, Oropharyngeal and cloacal swabs	2014-02-19	2014	Safari Park	Gazipur	Pseudibis papillosa	Red-naped ibis	Healthy	Wild	Adult	Unidentified	Release after sampling	Chattogram Veterinary and Animal Sciences University	Gazipur	Bangladesh	rRT-PCR	Negative	c-ELISA	Negative	Haemagglutination inhibition	Negative
